# Supplementary material for: Hypertonic saline mediates the NLRP3/IL‐1β signaling axis in microglia to alleviate ischemic blood‐brain barrier permeability by downregulating astrocyte‐derived VEGF in rats
Source: CNS Neurosci Ther. 2020 Jun 12;26(10):1045–57. doi: 10.1111/cns.13427 (PMC7539845; doi:10.1111/cns.13427)

**A**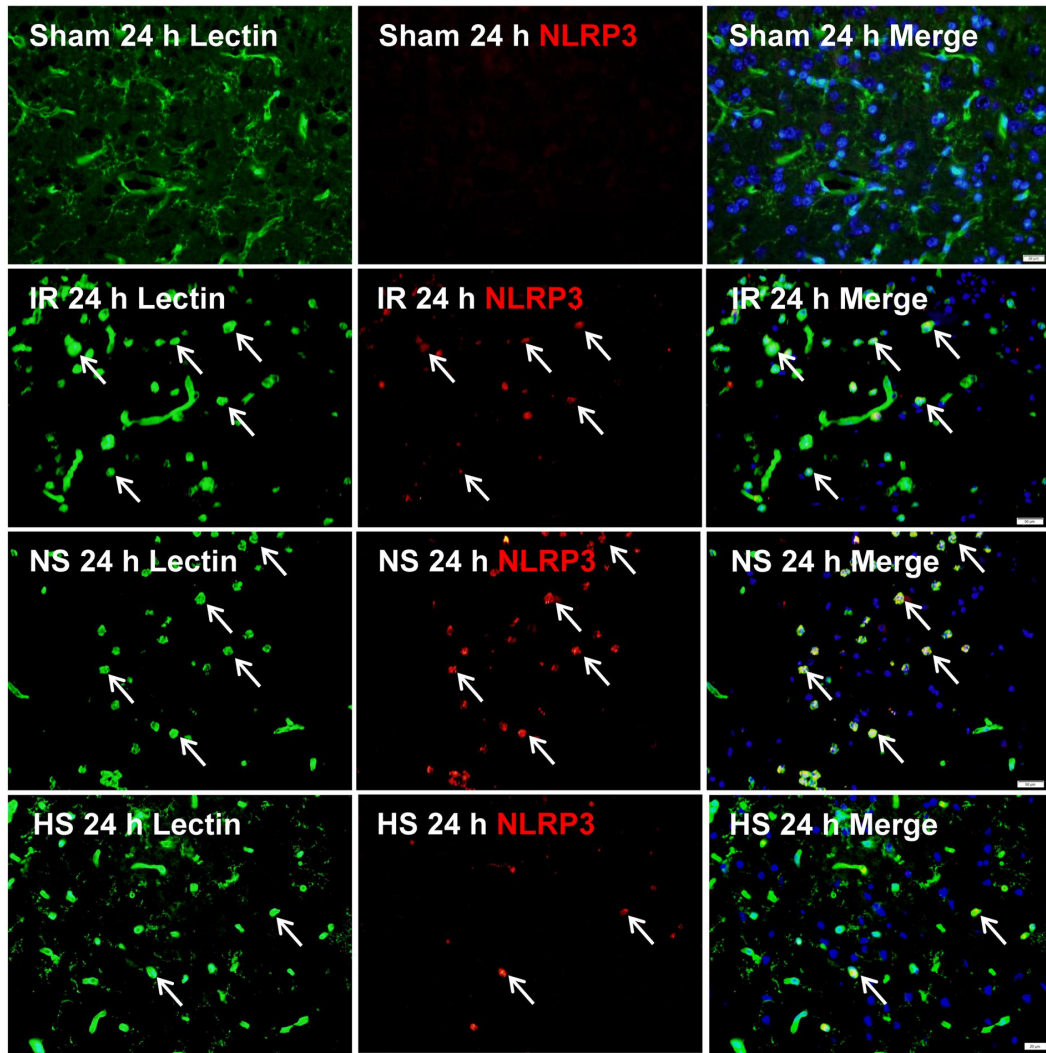**B**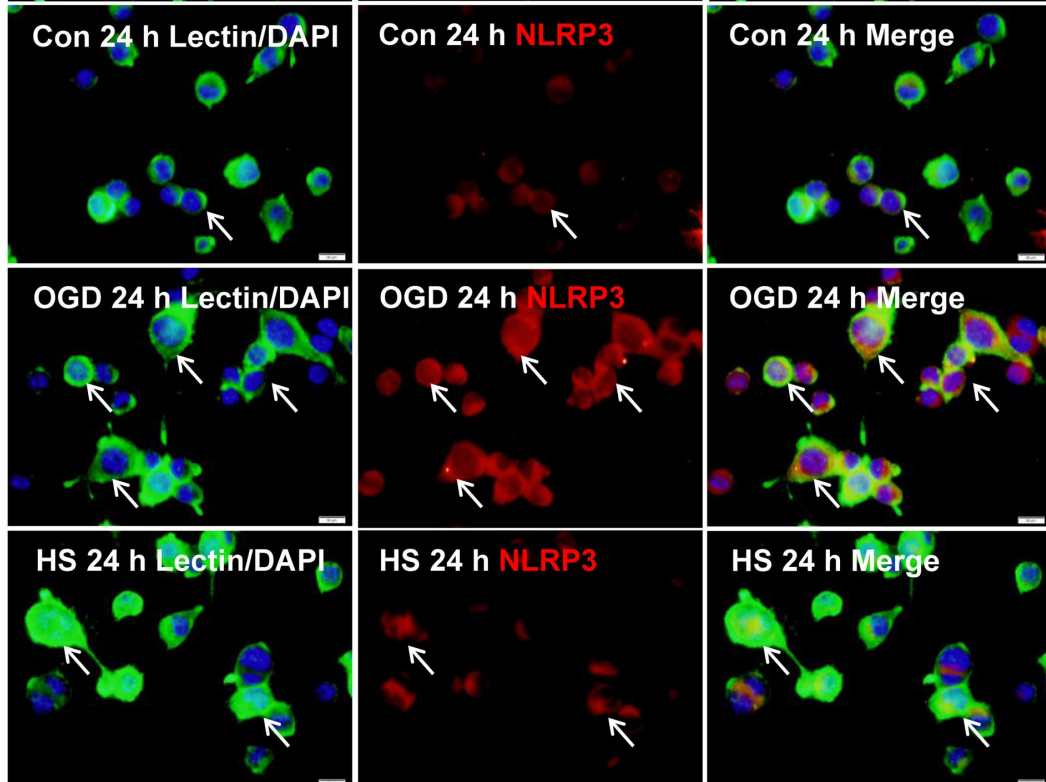

**Supplementary Figure 1** HS downregulates NLRP3 protein expression in microglia in ischaemia-reperfusion or hypoxia-reoxygenation as detected by immunofluorescence. The immunofluorescence images (A) show that compared with that in the sham group, NLRP3 protein expression (red) in lectin-positive microglia (green) in the peri-ischaemic brain tissue was markedly enhanced in the IR and NS groups 24 h after reperfusion, but its expression declined 24 h after HS treatment. B. Likewise, the *in vitro* NLRP3 protein expression (red) in lectin-positive BV-2 microglial cells (green) was obviously increased at 24 h in the OGD group compared with that in the control group; however, its expression decreased after incubation with 80 mM HS for 24 h. Scale bars: 20  $\mu$ m. DAPI-blue. n=3 for each group.

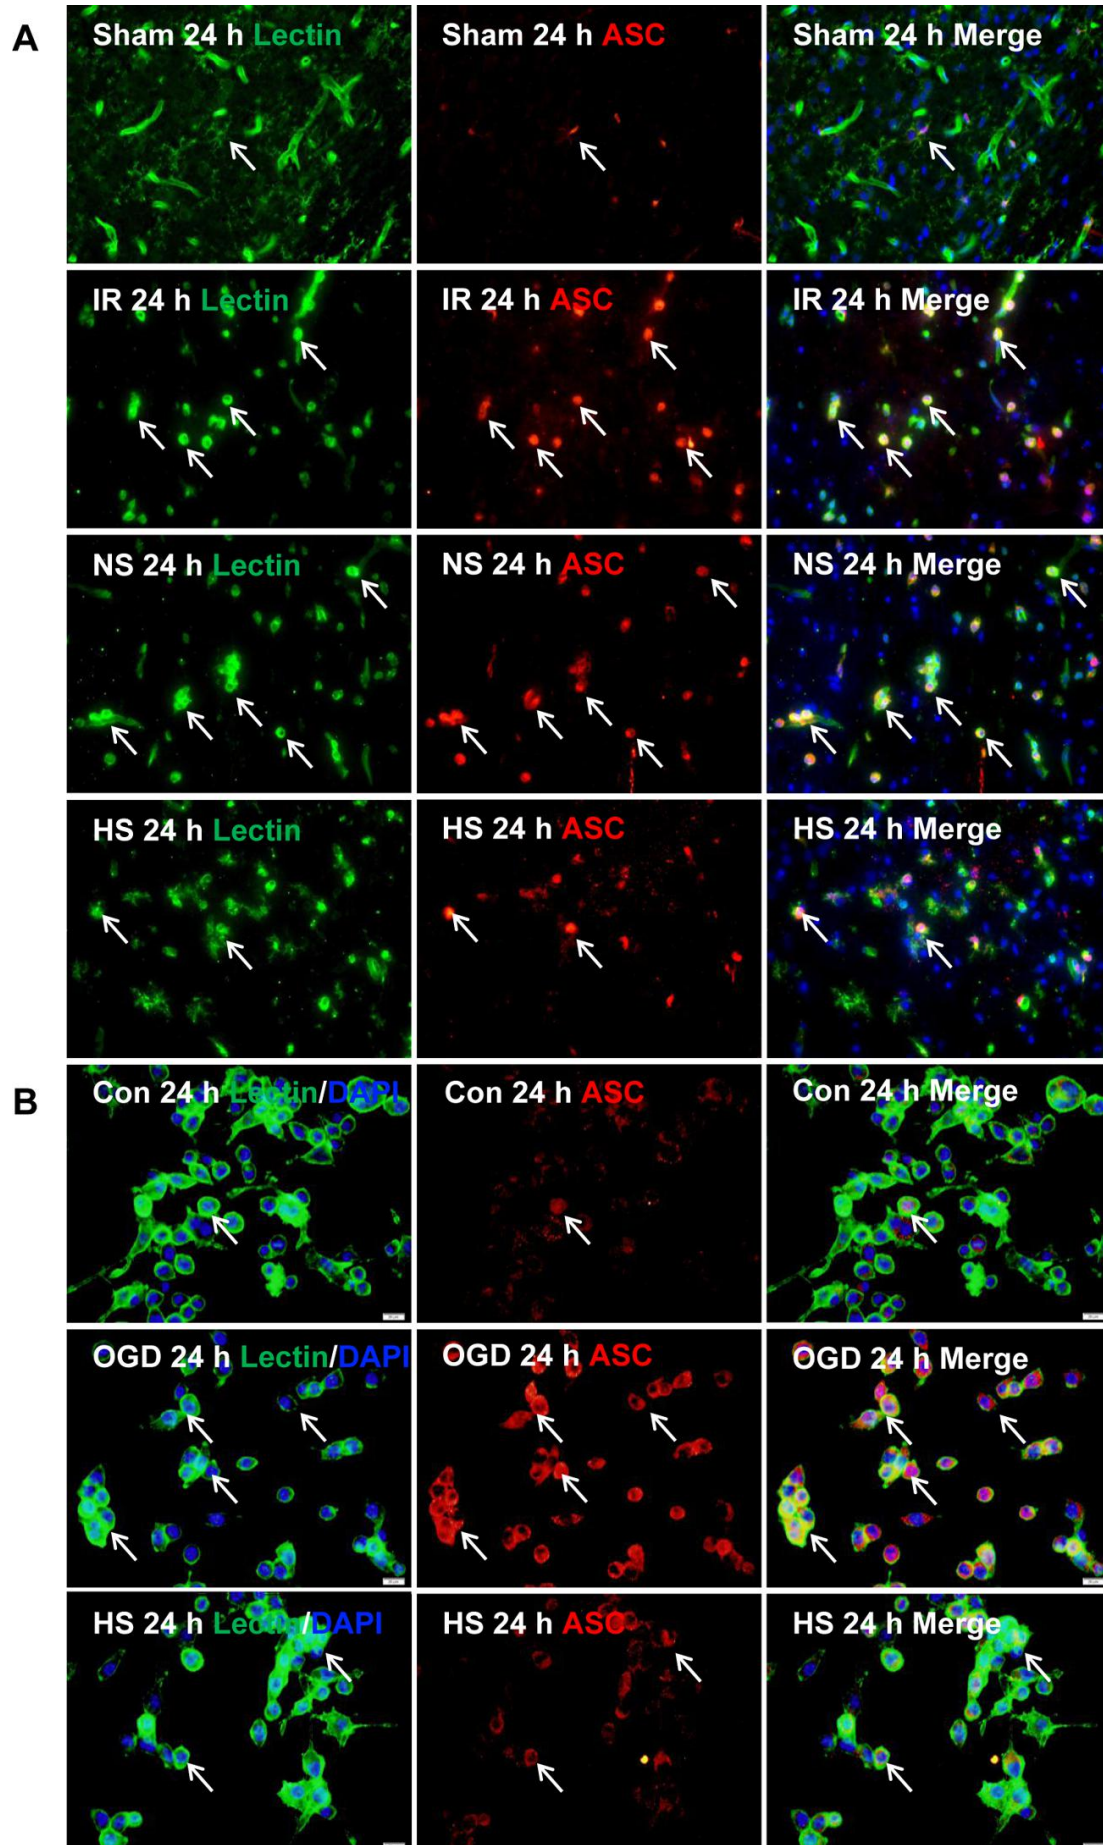

**Supplementary Figure 2** HS downregulates ASC protein expression in microglia in ischaemia-reperfusion or hypoxia-reoxygenation as detected by immunofluorescence. The immunofluorescence images (A) show that compared with that in the sham group, ASC protein expression (red) in lectin-positive microglia (green) in the peri-ischaemic brain tissue was markedly enhanced in the IR and NS groups 24 h after reperfusion, but its expression declined at 24 h after HS treatment. B. Likewise, the *in vitro* ASC protein expression (red) in lectin-positive BV-2 microglial cells (green) was obviously increased at 24 h in the OGD group compared with that in the control group; however, its expression was decreased after incubation with 80 mM HS for 24 h. Scale bars: 20  $\mu$ m. DAPI-blue. n=3 for each group.

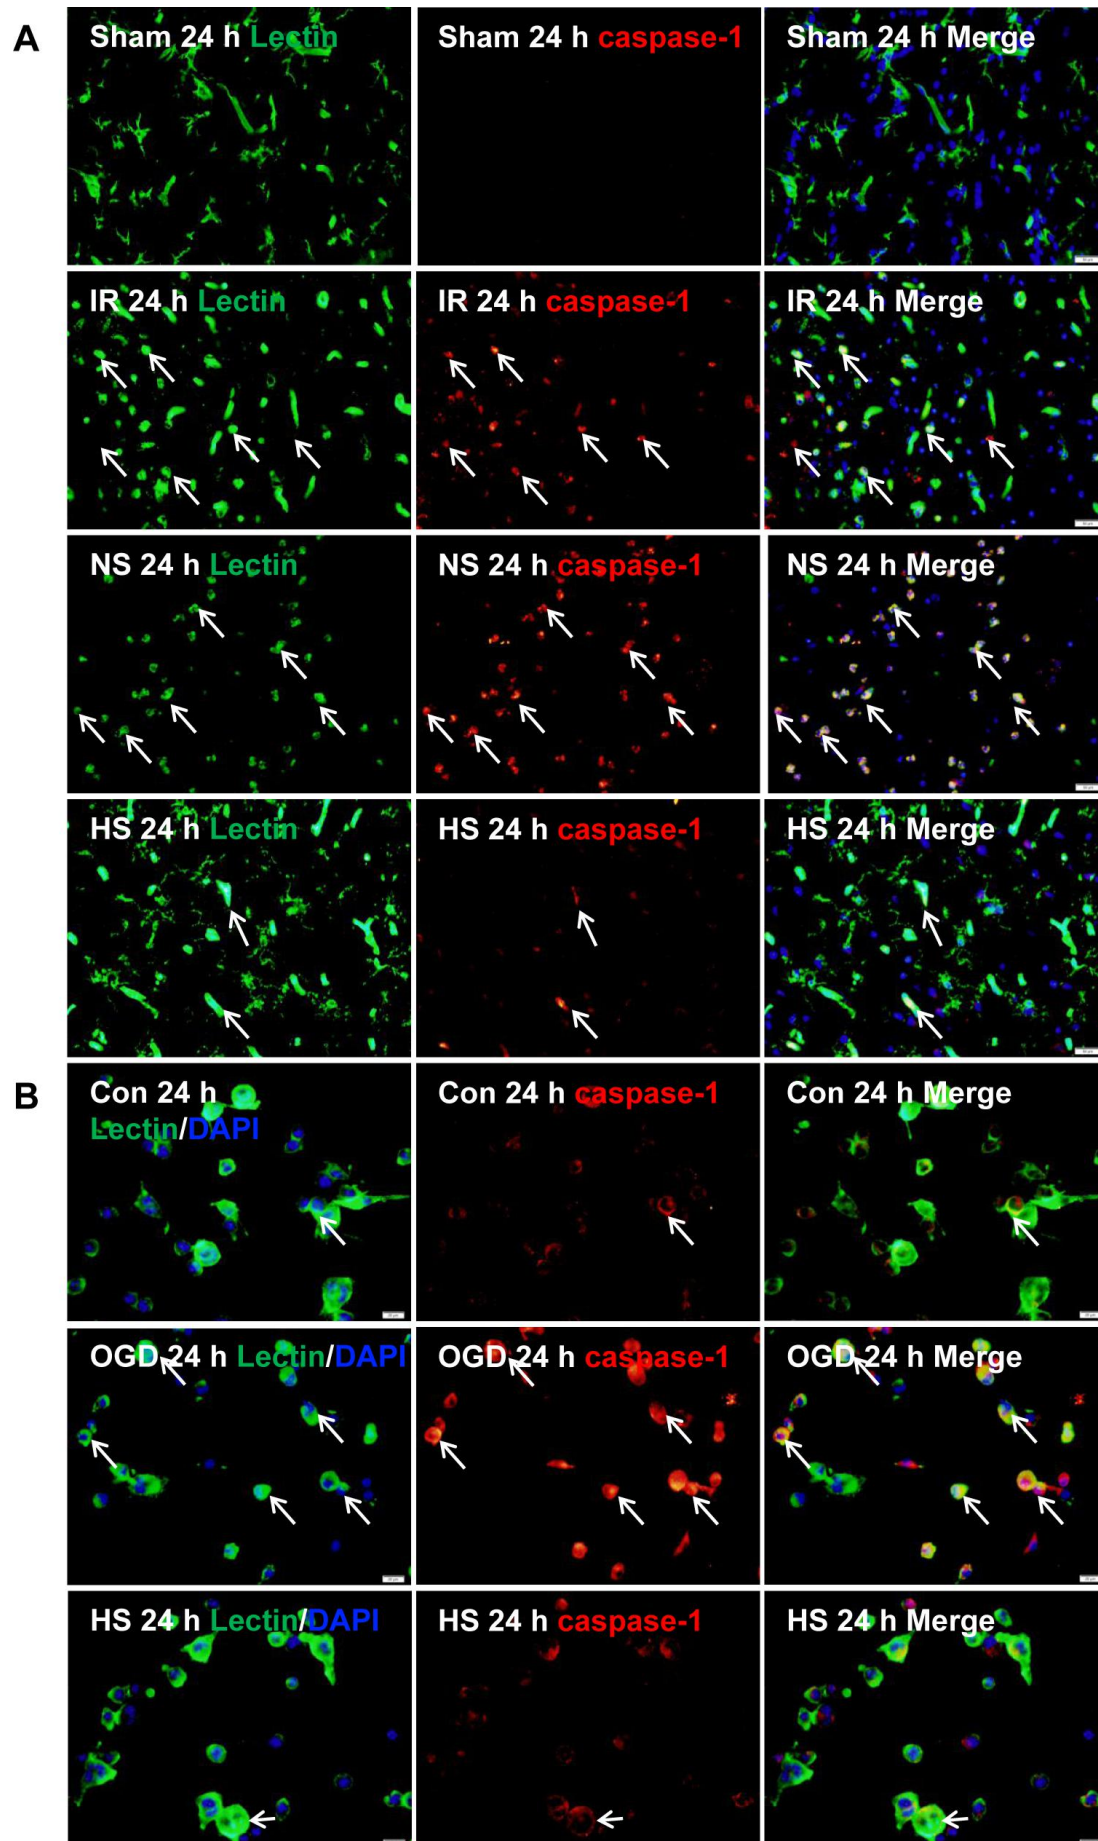

**Supplementary Figure 3** HS downregulates caspase-1 protein expression in microglia in ischaemia-reperfusion or hypoxia-reoxygenation as detected by immunofluorescence. The immunofluorescence images (A) show that compared with that in the sham group, caspase-1 protein expression (red) in lectin-positive microglia (green) in the peri-ischaemic brain tissue was markedly enhanced in the IR and NS groups 24 h after reperfusion, but its expression declined 24 h after HS treatment. B. Likewise, the *in vitro* caspase-1 protein expression (red) in lectin-positive BV-2 microglial cells (green) was obviously increased at 24 h in the OGD group compared with that in the control group; however, its expression was decreased after incubation with 80 mM HS for 24 h. Scale bars: 20  $\mu$ m. DAPI-blue. n=3 for each group.

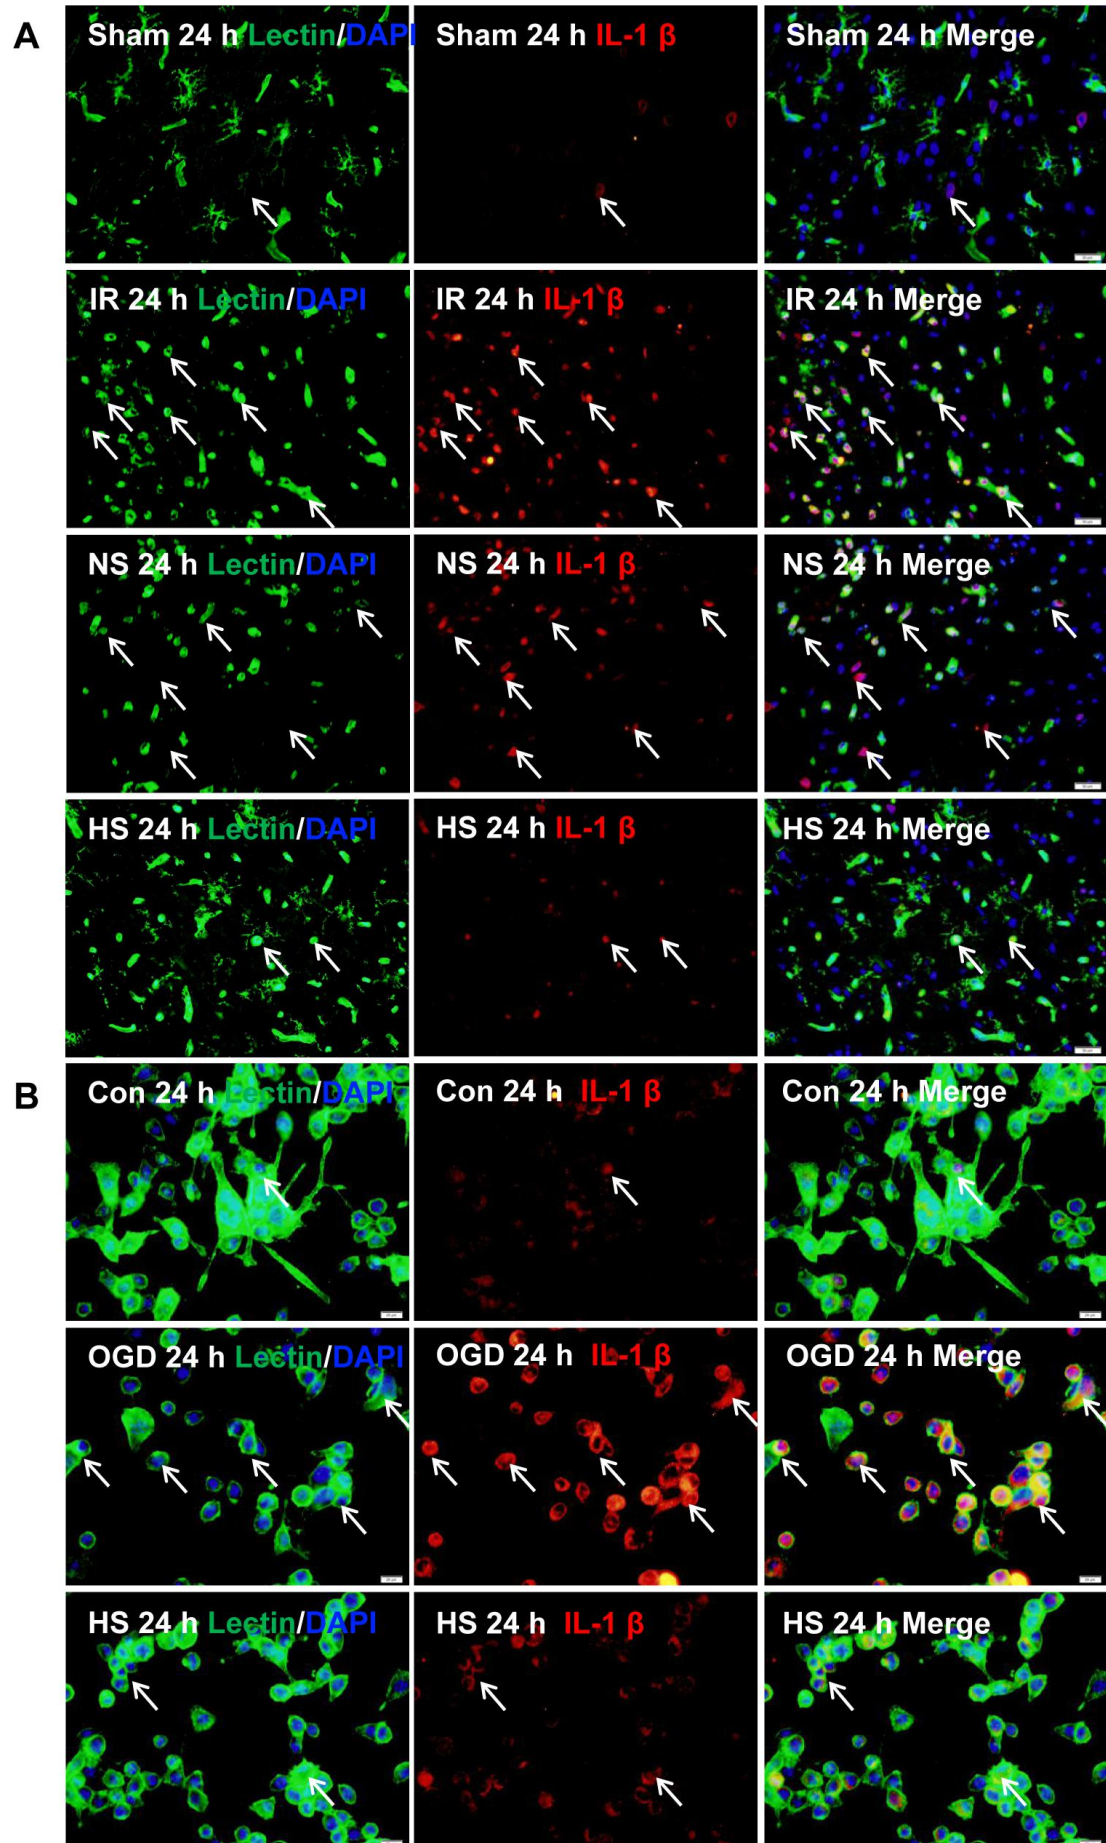

**Supplementary Figure 4** HS downregulates IL-1 $\beta$  protein expression in microglia in ischaemia-reperfusion or hypoxia-reoxygenation as detected by immunofluorescence. Immunofluorescence images (A) show that compared with that in the sham group, IL-1 $\beta$  protein expression (red) in lectin-positive microglia (green) in the peri-ischaemic brain tissue was markedly enhanced in the IR and NS groups 24 h after reperfusion, but its expression declined 24 h after HS treatment. B. Likewise, the *in vitro* IL-1 $\beta$  protein expression (red) in lectin-positive BV-2 microglial cells (green) was obviously increased at 24 h in the OGD group compared with that in the control group; however, its expression was decreased after incubation with 80 mM HS for 24 h. Scale bars: 20  $\mu$ m. DAPI-blue. n=3 for each group.

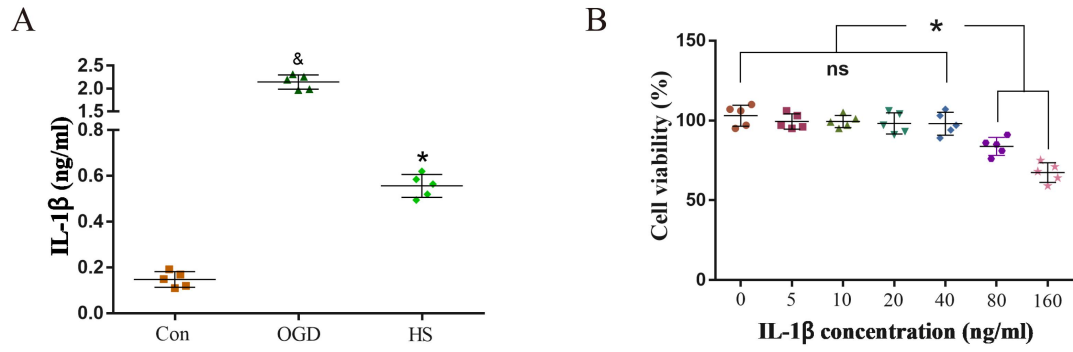

**Supplementary Figure 5** HS downregulates IL-1 $\beta$  protein expression in microglia by ELISA, and the effect of IL-1 $\beta$  on activity of astrocytes. A. The IL-1 $\beta$  levels in OGD group was much higher than the control group ( $^{\&}P < 0.05$ ), but after HS treatment, the levels decreased significantly ( $^*P < 0.05$ ). The values represent the means  $\pm$  SD,  $n=5$ . B. Appropriate concentrations of IL-1 $\beta$  were detected by the CCK-8 (cell counting kit-8) assay. The viability of TNC1 astrocytes decreased significantly when incubated with IL-1 $\beta$  at a dose exceeding 40 ng/mL. ELISA, enzyme-linked immunosorbent assay.

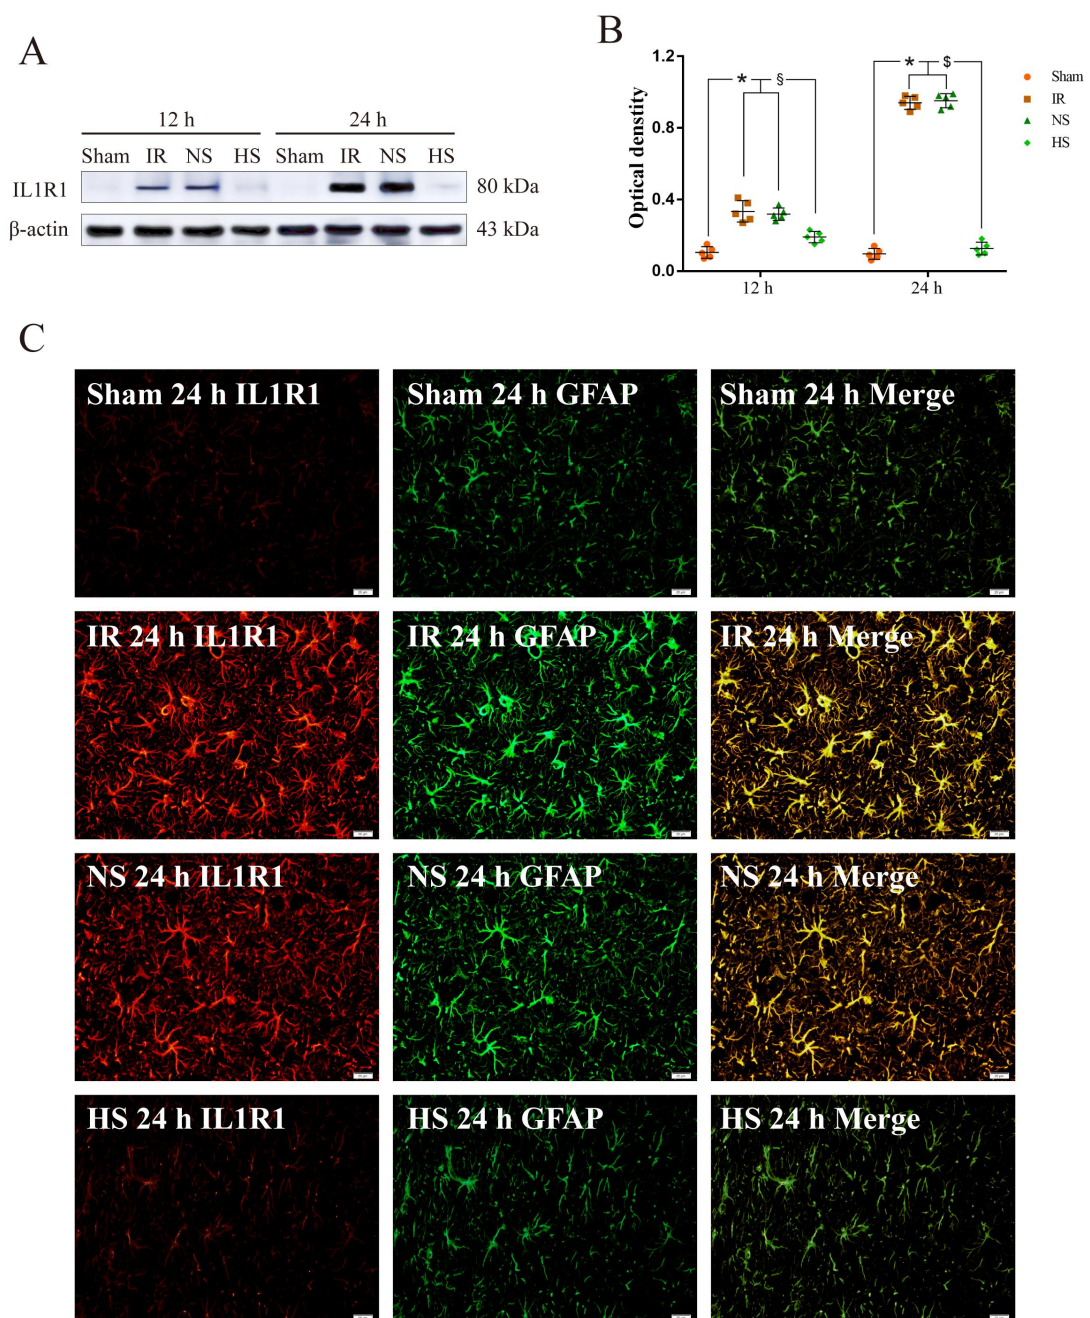

**Supplementary Figure 6** IL1R1 protein expression in the astrocytes of the peri-ischaemic brain tissue. Panel A shows the IL1R1 (80 kDa) and  $\beta$ -actin (43 kDa) immunoreactive bands detected by the appropriate primary antibodies in the astrocytes of the peri-ischaemic brain tissue at 12 h and 24 h in different groups, respectively. The bar graph in B shows the downregulation of IL1R1 protein expression at 12 h and 24 h in the HS group compared with the protein expression in the IR and NS groups, respectively ( $^{\$}P<0.05$  and  $^{\&}P<0.05$  versus the IR and NS groups). The values represent the means  $\pm$  SD, n=5. Panel C shows IL1R1 immunofluorescence staining (red) in GFAP-positive astrocytes (green) in different groups. Note the colocalized expression of IL1R1 and GFAP in the astrocytes. Scale bars in panel A: 20  $\mu$ m. n=3 for each group.

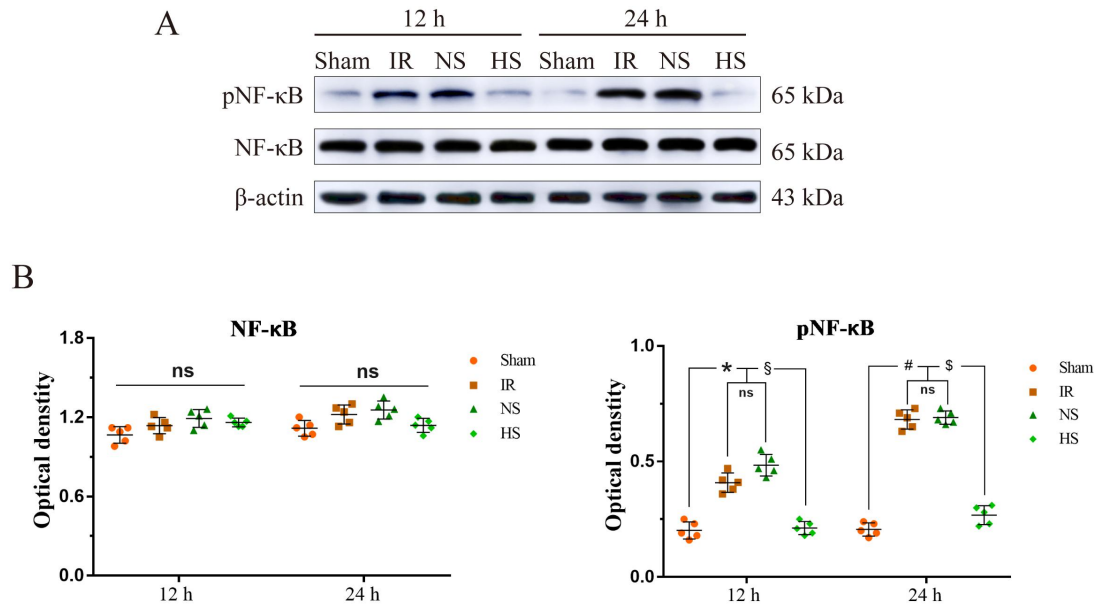

**Supplementary Figure 7** pNF-κBp65 protein expression in the astrocytes of the peri-ischaemic brain tissue. Panel A shows the NF-κBp65 and pNF-κBp65 (65 kDa) and β-actin (43 kDa) immunoreactive bands detected by the primary antibody in the astrocytes of the peri-ischaemic brain tissue at 12 h and 24 h in different groups, respectively. The bar graph in B shows that NF-κBp65 protein expression was not different in each group; however, pNF-κBp65 protein expression at 12 h and 24 h in the HS group was upregulated compared with that in the IR and NS groups ( $^{\$}P<0.05$  and  $^{\&}P<0.05$  versus IR group and NS group). The values represent the means  $\pm$  SD,  $n=5$  for each group; ns: non-significant,  $P>0.05$ .

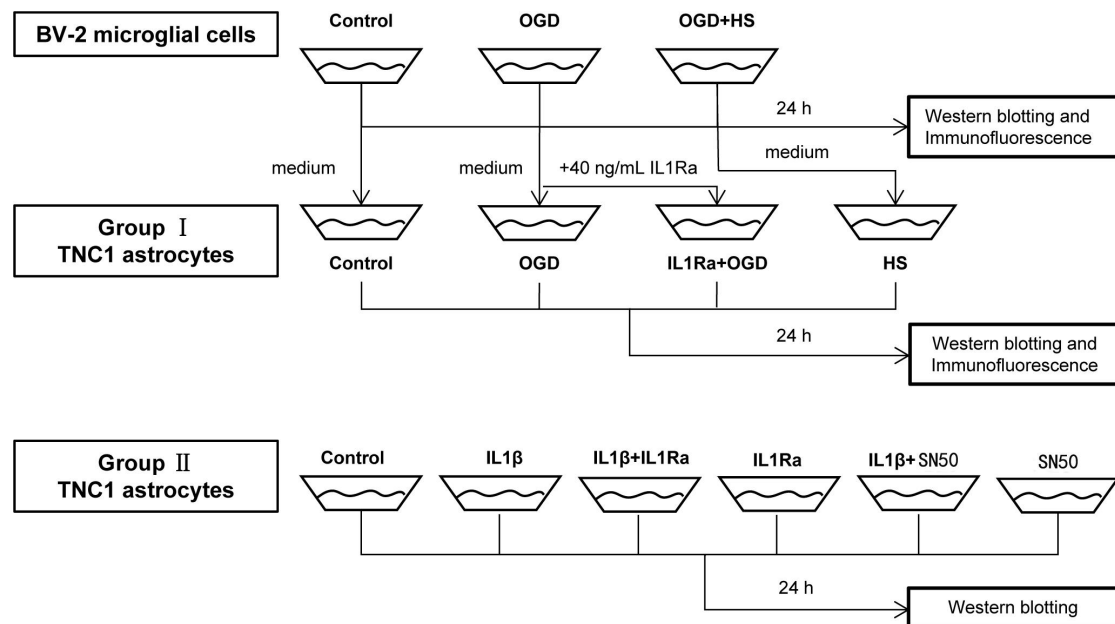

**Supplementary Figure 8** The schematic diagram depicts the design and flow chart of the cell experiment. The schematic diagram depicts the design and flow chart of the cell experiment *in vitro*.

**Supplementary Figure 9** Full unedited blots for Figure 3.

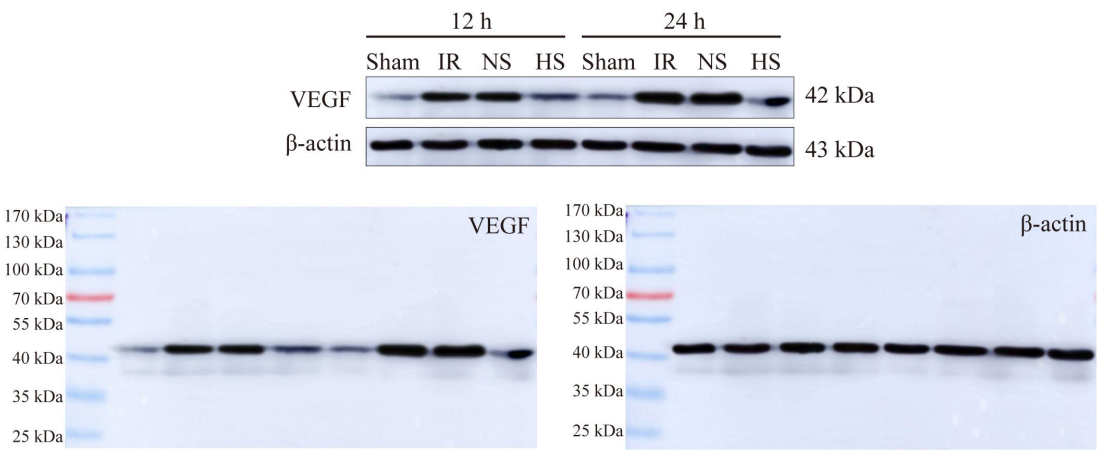

**Supplementary Figure 10** Full unedited blots for Figure 4.

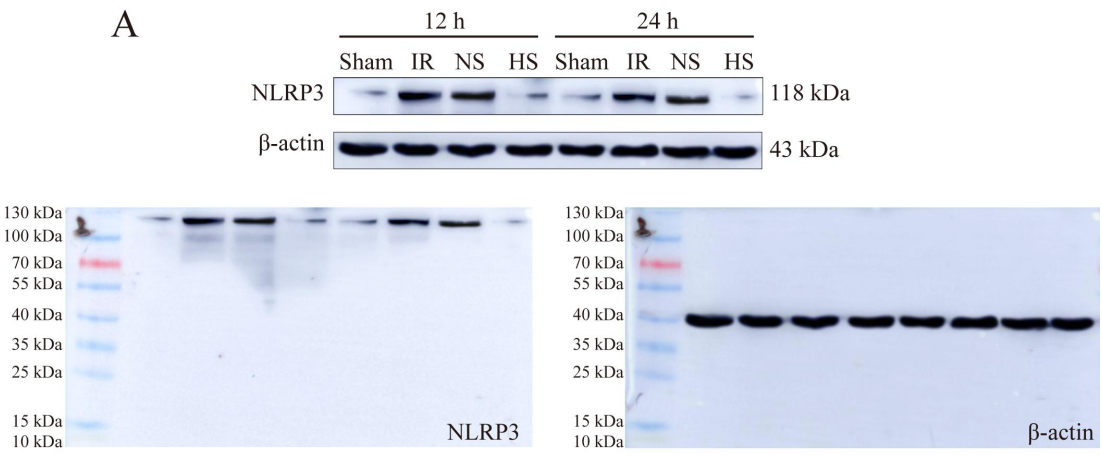

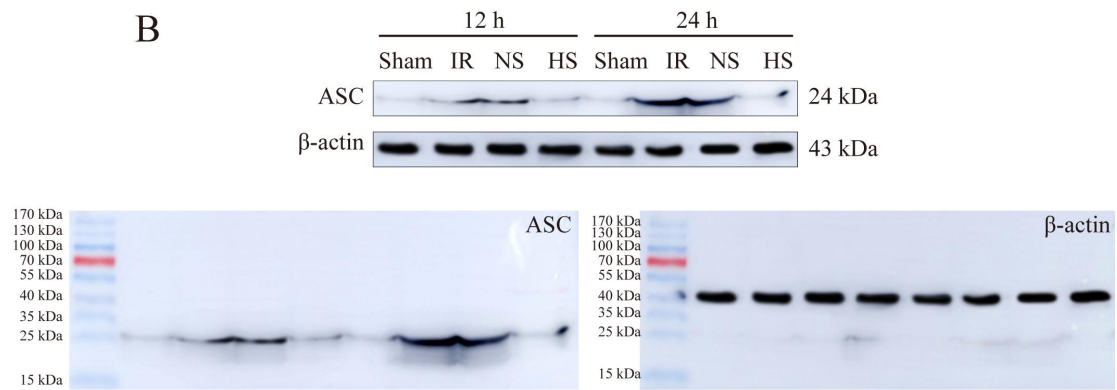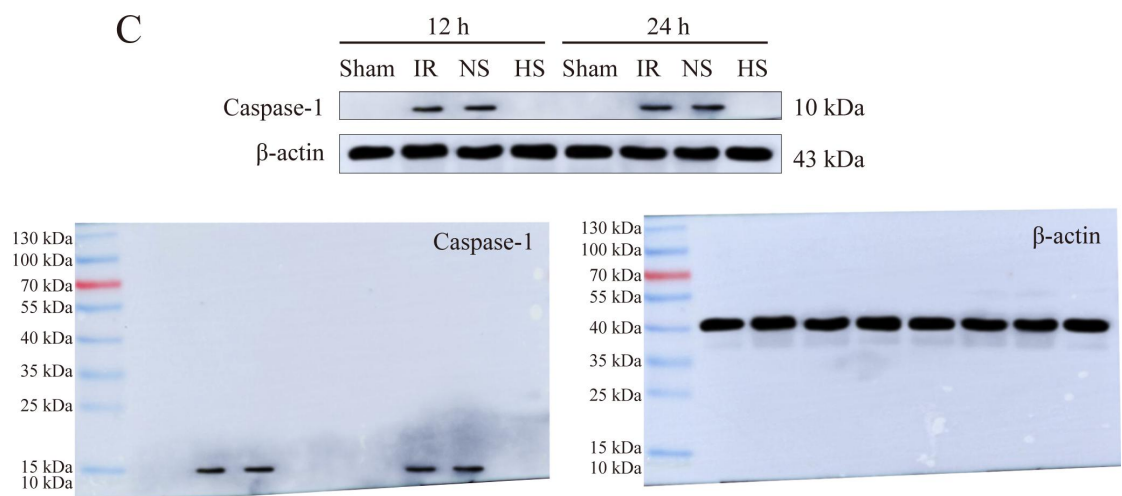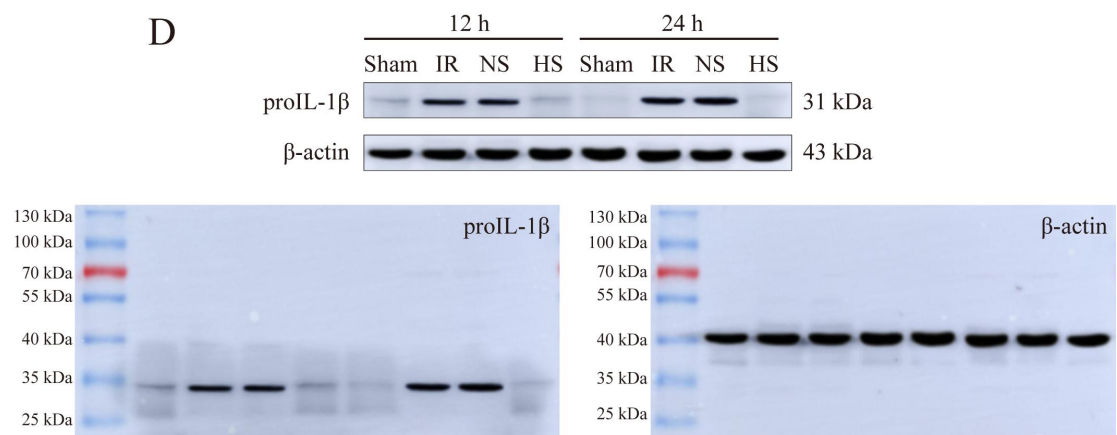

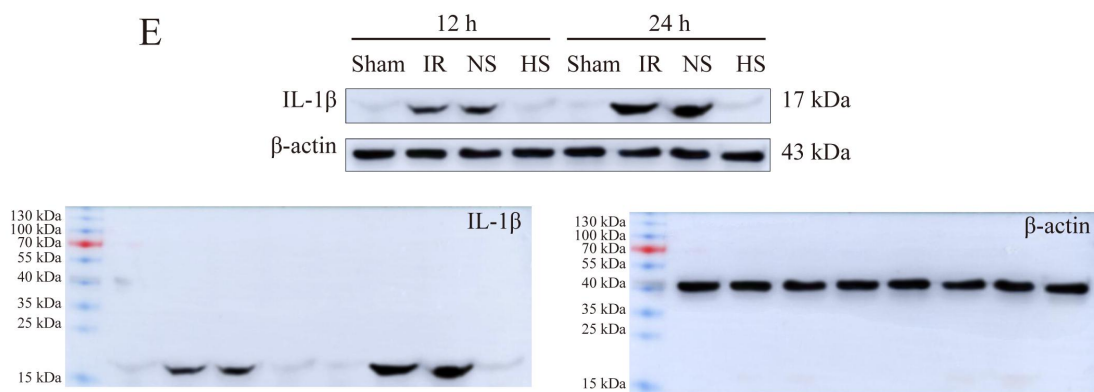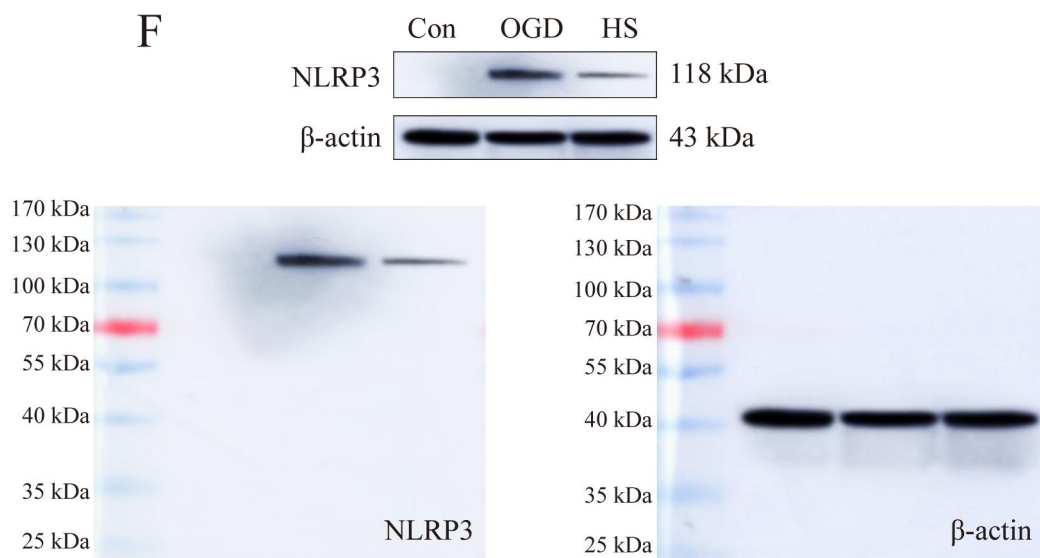

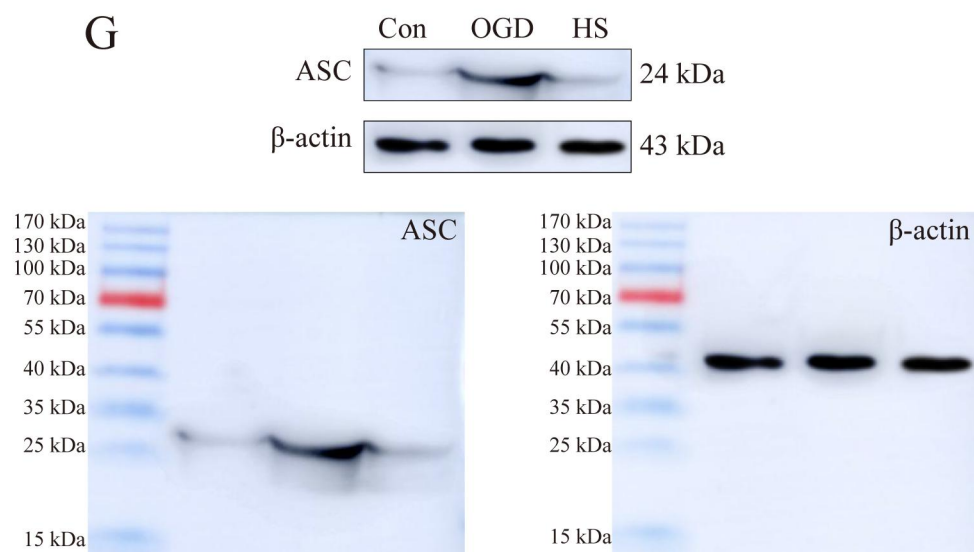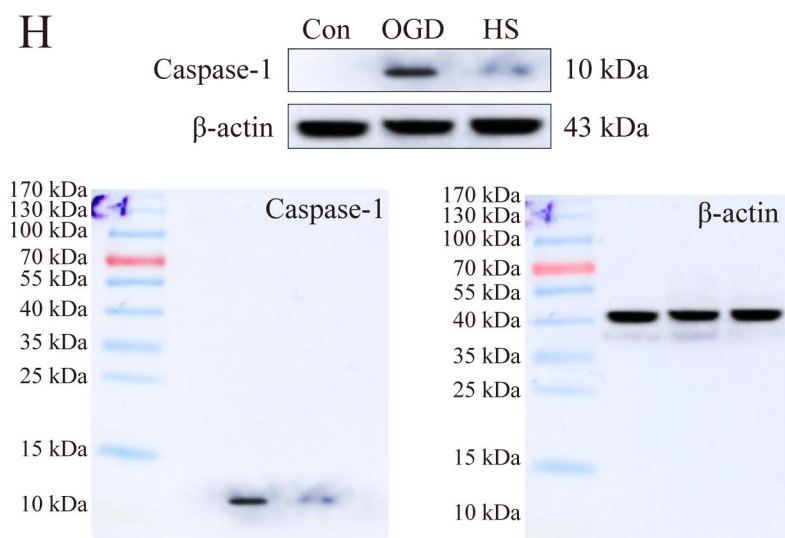

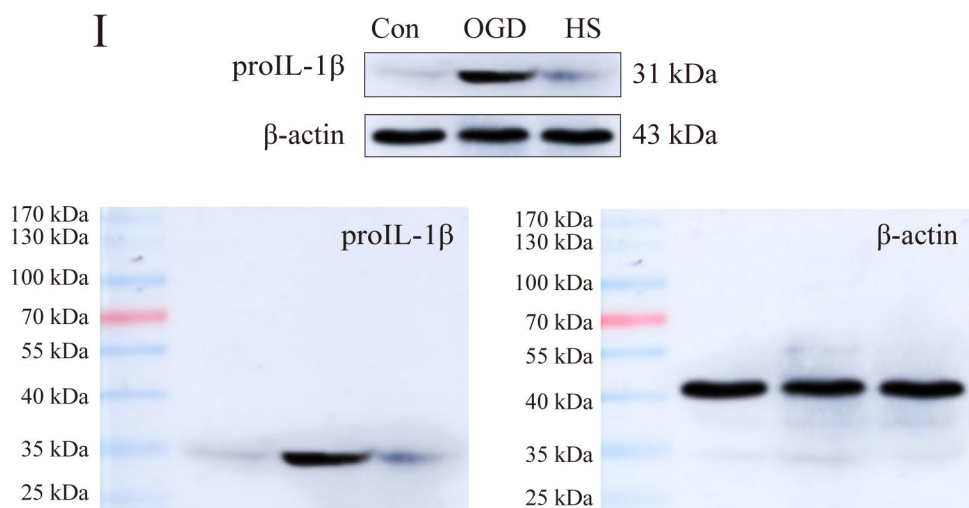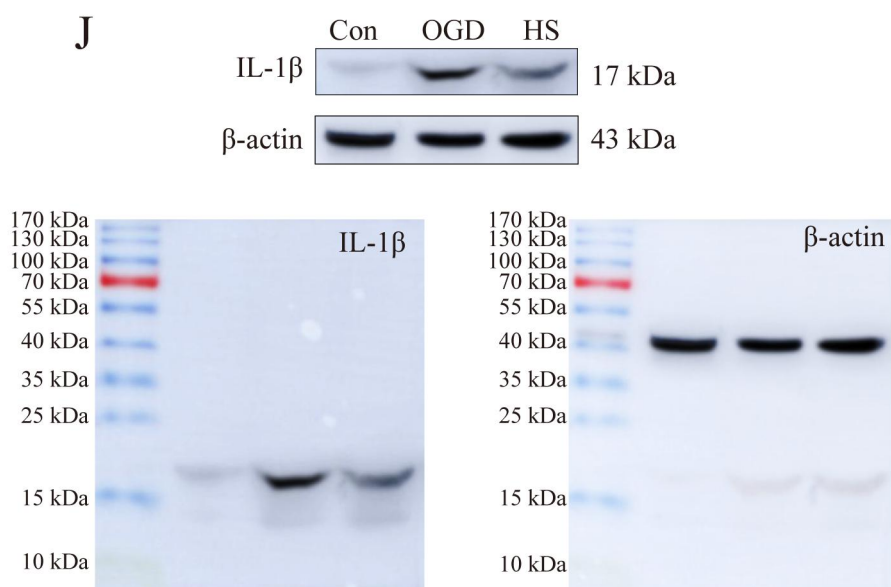

**Supplementary Figure 11** Full unedited blots for Figure 5.

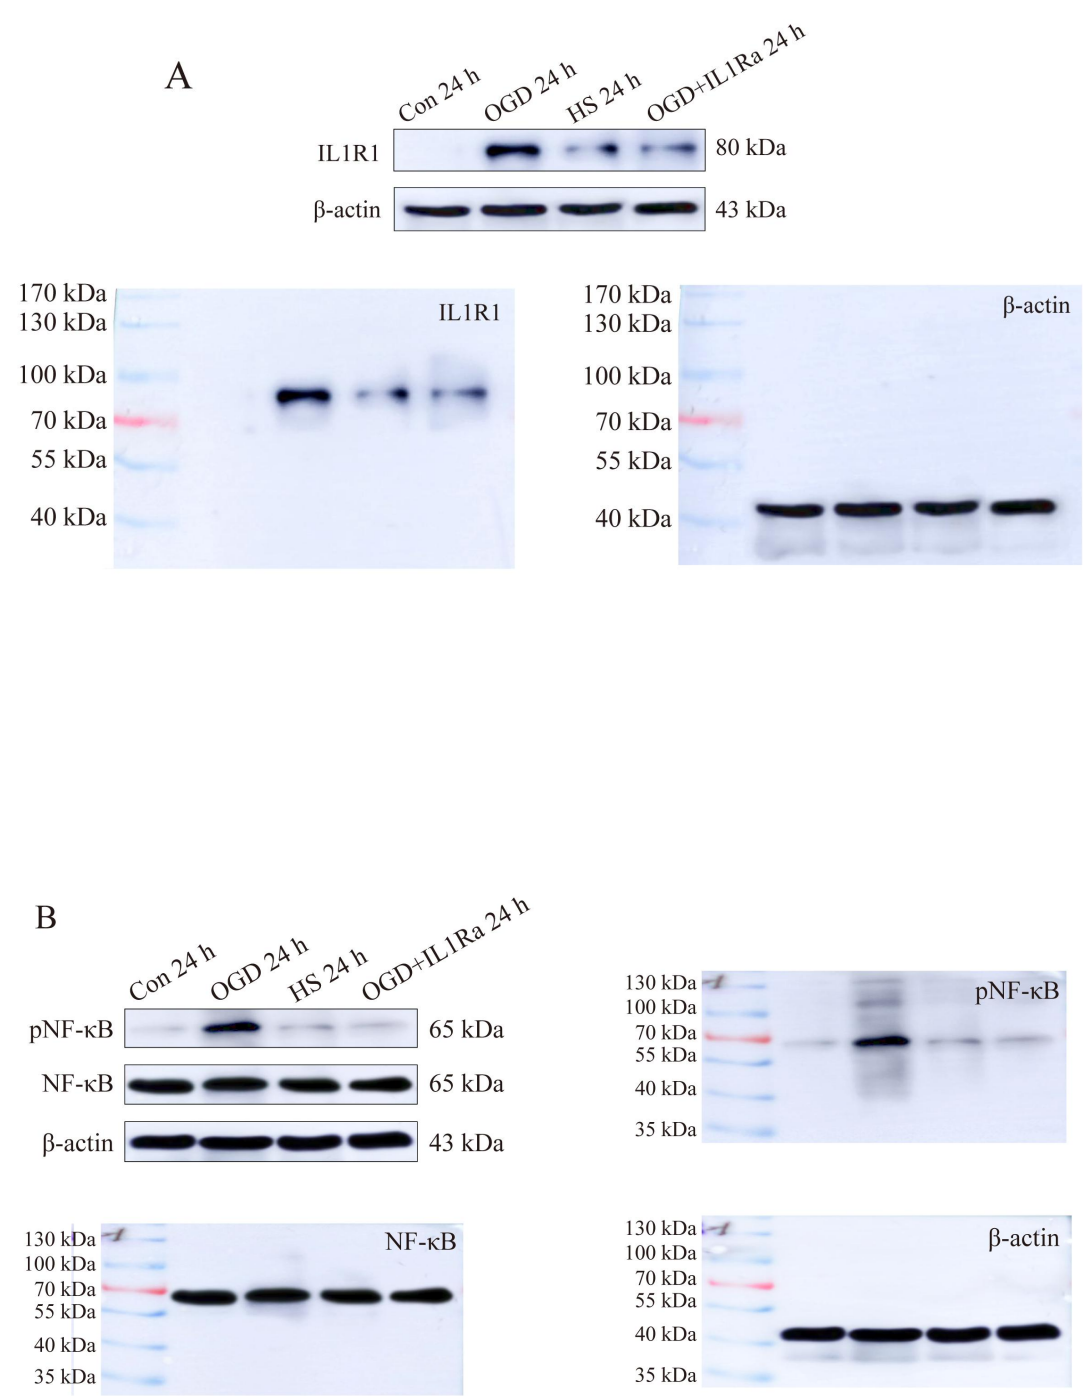

C

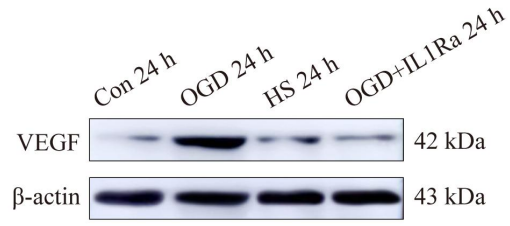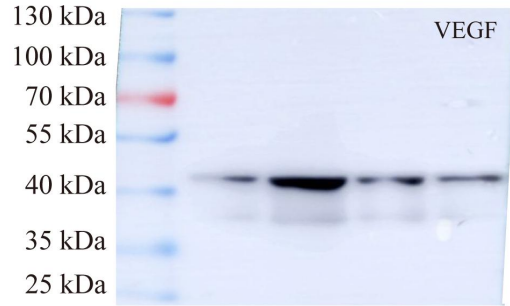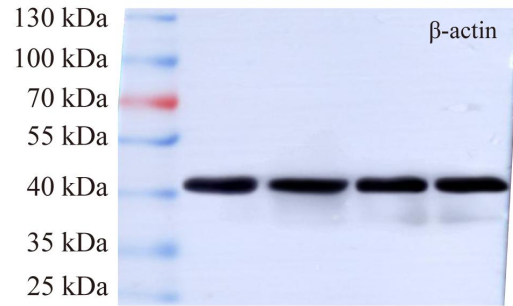

D

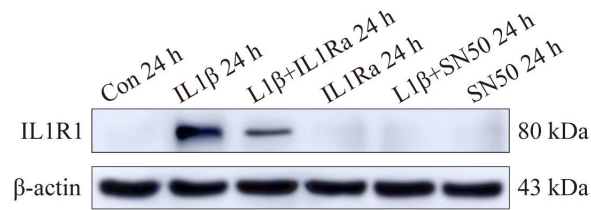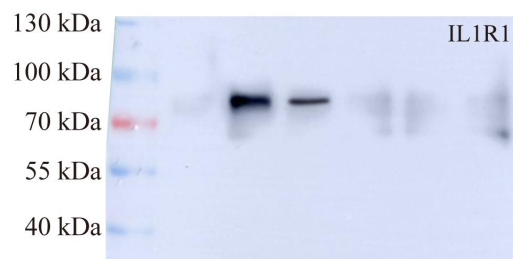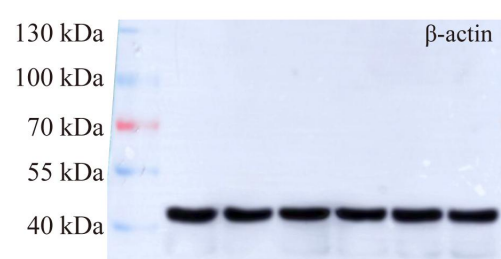

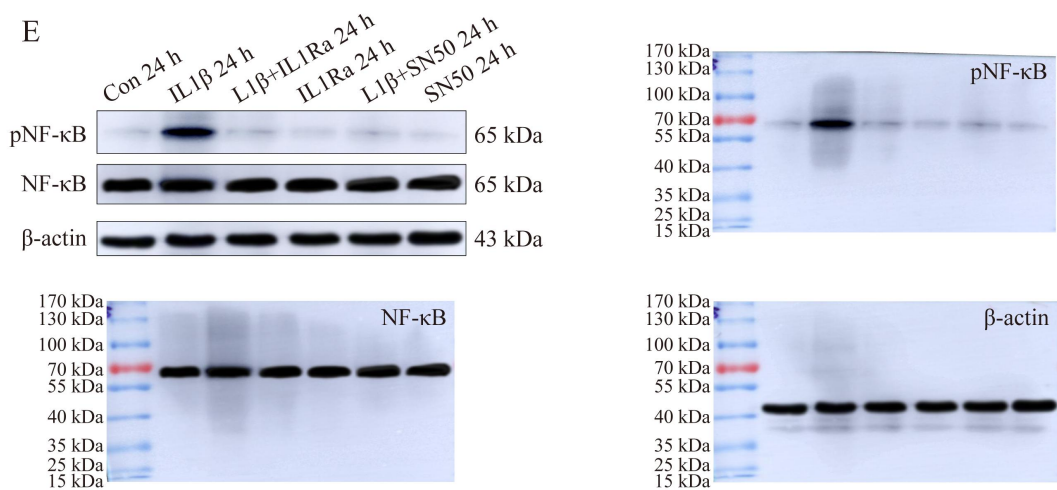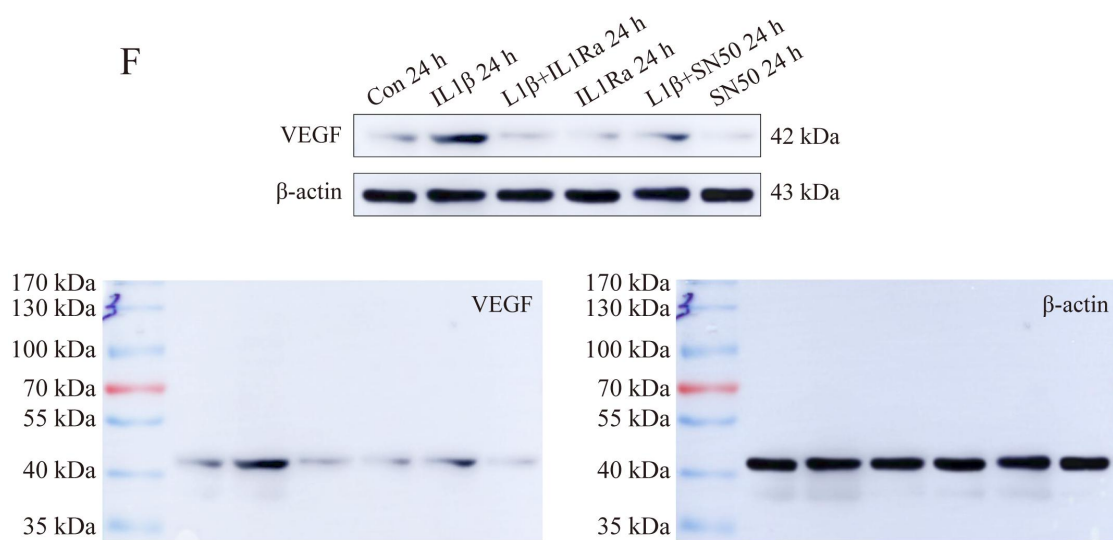

**Supplementary Figure 12** Full unedited blots for Supplementary Figure 6.

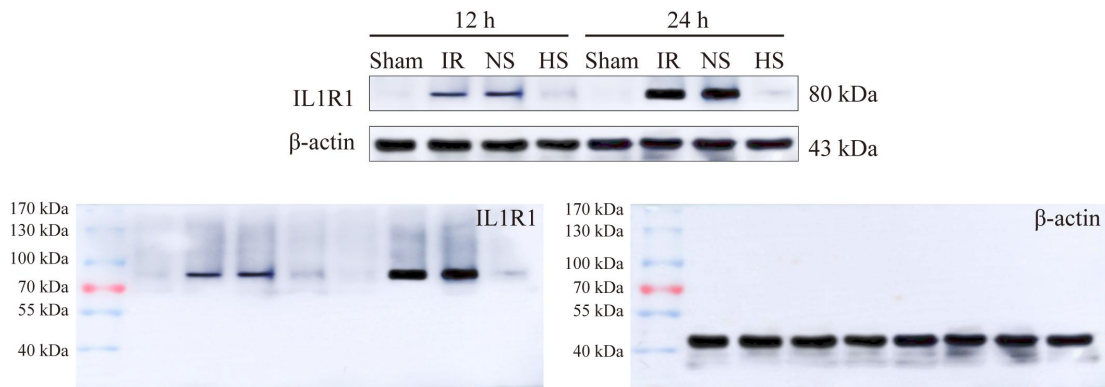

**Supplementary Figure 13** Full unedited blots for Supplementary Figure 7.

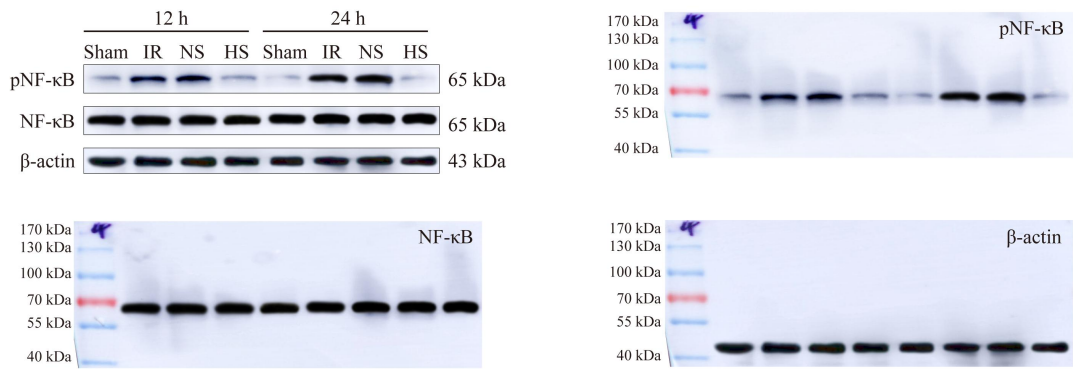

Supplement: Supplementary file 1 — Fig S1‐S13 [file CNS-26-1045-s001.pdf]
